# Supplementary material
Source: ML conference proceedings conference paper supplement (https://openreview.net/forum?id=Hh4VpIUiqeq)
Supplement: supplementary_material [file attachment]

---

# PathFlow: A Normalizing Flow Generator that Finds Transition Paths

## Supplementary Material

---

Tianyi Liu<sup>1</sup>

Weihao Gao<sup>1</sup>

Zhirui Wang<sup>1</sup>

Chong Wang<sup>1</sup>

<sup>1</sup>ByteDance Inc.

### A PROOF OF THEOREM 4.1

For any function  $F \in \{M_{ij}, \nabla_i U, \nabla_l M_{ij}, \nabla_{ij}^2 U\}$ , the error of the estimator can be decomposed by triangle inequality as follows,

$$|F^{(T,k)}(\mathbf{z}) - F(\mathbf{z})| \leq |F^{(k)}(\mathbf{z}) - F(\mathbf{z})| + |F^{(T,k)}(\mathbf{z}) - F^{(k)}(\mathbf{z})|.$$

The first term is introduced by the finiteness of  $k$ . The second term is introduced by finiteness of the time  $T$  of restrained dynamics. The following two lemmas provide upper bounds for finite- $k$  error and finite- $T$  error respectively.

**Lemma A.1** (Error by finite  $k$ ). *For any function  $g(\mathbf{r})$ , consider the two functionals  $\mathcal{I}[g]$  and  $\mathcal{I}^{(k)}[g]$  defined as follows*

$$\begin{aligned} \mathcal{I}[g](\mathbf{z}) &= \int_{\mathbb{R}^{3D}} g(\mathbf{r}) e^{-\beta V(\mathbf{r})} \prod_{j=1}^N \delta(x_j(\mathbf{r}) - z_j) d\mathbf{r}, \\ \mathcal{I}^{(k)}[g](\mathbf{z}) &= \left(\frac{2\pi}{\beta k}\right)^{N/2} \int_{\mathbb{R}^{3D}} g(\mathbf{r}) e^{-\beta(V(\mathbf{r}) + \frac{k}{2} \sum_{j=1}^N (x_j(\mathbf{r}) - z_j)^2)} d\mathbf{r}. \end{aligned}$$

Their difference are bounded by

$$|\mathcal{I}[g](\mathbf{z}) - \mathcal{I}^{(k)}[g](\mathbf{z})| \leq \frac{1}{2\beta k} \text{Tr}[\nabla_{\mathbf{z}}^2 \mathcal{I}[g](\mathbf{z})].$$

Moreover, the difference of the derivatives of  $\mathcal{I}[g](\mathbf{z})$  and  $\mathcal{I}^{(k)}[g](\mathbf{z})$  are bounded by

$$\left| \frac{\partial^p}{\partial z_{i_1}, \dots, \partial z_{i_p}} \mathcal{I}[g](\mathbf{z}) - \frac{\partial^p}{\partial z_{i_1}, \dots, \partial z_{i_p}} \mathcal{I}^{(k)}[g](\mathbf{z}) \right| \leq \frac{1}{2\beta k} \frac{\partial^p}{\partial z_{i_1}, \dots, \partial z_{i_p}} \text{Tr}[\nabla_{\mathbf{z}}^2 \mathcal{I}[g](\mathbf{z})].$$

*Proof.* The proof of the upper bound of  $|\mathcal{I}[g](\mathbf{z}) - \mathcal{I}^{(k)}[g](\mathbf{z})|$  follows Maragliano et al. (2006). We generate the proof to the upper bound of the derivatives. Consider the Fourier transform of  $\mathcal{I}[g](\mathbf{z})$  as follows

$$\begin{aligned} \hat{G}(\zeta) &= \int_{\mathbb{C}^N} e^{-i\zeta \cdot \mathbf{z}} \int_{\mathbb{R}^{3D}} g(\mathbf{r}) e^{-\beta V(\mathbf{r})} \prod_{j=1}^N \delta(x_j(\mathbf{r}) - z_j) d\mathbf{r} d\mathbf{z} = \int_{\mathbb{R}^{3D}} g(\mathbf{r}) e^{-\beta V(\mathbf{r})} \int_{\mathbb{C}^N} e^{-i\zeta \cdot \mathbf{z}} \prod_{j=1}^N \delta(x_j(\mathbf{r}) - z_j) d\mathbf{z} d\mathbf{r} \\ &= \int_{\mathbb{R}^{3D}} g(\mathbf{r}) e^{-\beta V(\mathbf{r})} e^{-i\zeta \cdot \mathbf{x}(\mathbf{r})} d\mathbf{r}. \end{aligned}$$

The Fourier transform of  $\mathcal{I}^{(k)}[g](\mathbf{z})$  is

$$\begin{aligned}
\hat{G}^{(k)}(\zeta) &= \left(\frac{2\pi}{\beta k}\right)^{N/2} \int_{\mathbb{C}^N} e^{-i\zeta \cdot \mathbf{z}} \int_{\mathbb{R}^{3D}} g(\mathbf{r}) e^{-\beta(V(\mathbf{r}) + \frac{k}{2} \sum_{j=1}^N (x_j(\mathbf{r}) - z_j)^2)} d\mathbf{r} d\mathbf{z} \\
&= \left(\frac{2\pi}{\beta k}\right)^{N/2} \int_{\mathbb{R}^{3D}} g(\mathbf{r}) e^{-\beta V(\mathbf{r})} \int_{\mathbb{C}^N} \exp\left\{-i\zeta \cdot \mathbf{z} - \frac{\beta k}{2} \sum_{j=1}^N (x_j(\mathbf{r}) - z_j)^2\right\} d\mathbf{z} d\mathbf{r} \\
&= \left(\frac{2\pi}{\beta k}\right)^{N/2} \int_{\mathbb{R}^{3D}} g(\mathbf{r}) e^{-\beta V(\mathbf{r})} \int_{\mathbb{C}^N} \exp\left\{-\frac{\beta k}{2} \sum_{j=1}^N (z_j - x_j(\mathbf{r}) + \frac{i}{\beta k} \zeta_j)^2 - i\zeta \cdot \mathbf{x}(\mathbf{r}) - \frac{|\zeta|^2}{2\beta k}\right\} d\mathbf{z} d\mathbf{r} \\
&= \int_{\mathbb{R}^{3D}} g(\mathbf{r}) e^{-\beta V(\mathbf{r})} e^{-i\zeta \cdot \mathbf{x}(\mathbf{r}) - \frac{|\zeta|^2}{2\beta k}} d\mathbf{r} = e^{-\frac{|\zeta|^2}{2\beta k}} \hat{G}(\zeta).
\end{aligned}$$

By applying reverse Fourier transformation, we have

$$\begin{aligned}
|\mathcal{I}[g](\mathbf{z}) - \mathcal{I}^{(k)}[g](\mathbf{z})| &= \left| \int_{\mathbb{C}^N} e^{i\zeta \cdot \mathbf{z}} (\hat{G}(\zeta) - \hat{G}^{(k)}(\zeta)) d\zeta \right| \leq \int_{\mathbb{C}^N} e^{i\zeta \cdot \mathbf{z}} \hat{G}(\zeta) |1 - e^{-\frac{|\zeta|^2}{2\beta k}}| d\zeta \\
&\leq \int_{\mathbb{C}^N} e^{i\zeta \cdot \mathbf{z}} \hat{G}(\zeta) \frac{|\zeta|^2}{2\beta k} d\zeta = \frac{1}{2\beta k} \text{Tr}[\nabla_{\mathbf{z}} \mathcal{I}^{(k)}[g](\mathbf{z})].
\end{aligned}$$

To generalize the upper bound to the derivatives, notice the Fourier transform of the derivatives  $\frac{\partial^p}{\partial z_{i_1}, \dots, \partial z_{i_p}} \mathcal{I}[g](\mathbf{z})$  and  $\frac{\partial^p}{\partial z_{i_1}, \dots, \partial z_{i_p}} \mathcal{I}^{(k)}[g](\mathbf{z})$  are  $i^p \zeta_{i_1} \dots \zeta_{i_p} \hat{G}(\zeta)$  and  $i^p \zeta_{i_1} \dots \zeta_{i_p} \hat{G}^{(k)}(\zeta)$ , respectively. Similarly, applying reverse Fourier transformation

$$\begin{aligned}
\left| \frac{\partial^p}{\partial z_{i_1}, \dots, \partial z_{i_p}} \mathcal{I}[g](\mathbf{z}) - \frac{\partial^p}{\partial z_{i_1}, \dots, \partial z_{i_p}} \mathcal{I}^{(k)}[g](\mathbf{z}) \right| &\leq \int_{\mathbb{C}^N} e^{i\zeta \cdot \mathbf{z}} i^p \zeta_{i_1} \dots \zeta_{i_p} \hat{G}(\zeta) |1 - e^{-\frac{|\zeta|^2}{2\beta k}}| d\zeta \\
&\leq \int_{\mathbb{C}^N} e^{i\zeta \cdot \mathbf{z}} i^p \zeta_{i_1} \dots \zeta_{i_p} \hat{G}(\zeta) \frac{|\zeta|^2}{2\beta k} d\zeta = \frac{1}{2\beta k} \frac{\partial^p}{\partial z_{i_1}, \dots, \partial z_{i_p}} \text{Tr}[\nabla_{\mathbf{z}}^2 \mathcal{I}[g](\mathbf{z})].
\end{aligned}$$

□

**Lemma A.2** (Error by finite  $T$  (Maragliano et al., 2006)). *For any function  $f(\mathbf{r}, \mathbf{z})$ , consider the true average functional and the time average estimator defined as follows*

$$\begin{aligned}
\mathcal{A}^{(k)}[f](\mathbf{z}) &= \int_{\mathbb{R}^{3N}} f(\mathbf{r}, \mathbf{z}) p_k(\mathbf{r}, \mathbf{z}) d\mathbf{r}, \\
\mathcal{A}^{(T,k)}[f](\mathbf{z}) &= \frac{1}{T} \int_0^T f(\mathbf{r}(t), \mathbf{z}) dt.
\end{aligned}$$

As  $T \rightarrow \infty$ , their difference is given by

$$\mathcal{A}^{(T,k)}[f](\mathbf{z}) - \mathcal{A}^{(k)}[f](\mathbf{z}) = \sqrt{\frac{\tau_k[f](\mathbf{z})}{T}} \xi_k[f](\mathbf{z}),$$

where  $\xi_k[f](\mathbf{z})$  is a Gaussian variable with mean zero and variance

$$\text{Var}[\xi_k[f](\mathbf{z})] = \int_{\mathbb{R}^{3N}} (f(\mathbf{r}, \mathbf{z}) - \mathcal{A}^{(k)}[f](\mathbf{z}))^2 p_k(\mathbf{r}, \mathbf{z}) d\mathbf{r},$$

and  $\tau_k[f](\mathbf{z})$  is given by

$$\tau_k[f](\mathbf{z}) = \frac{1}{\text{Var}[\xi_k[f](\mathbf{z})]} \int_{t=0}^T \int_{\mathbb{R}^{3N}} \mathbb{E}[f(\mathbf{r}(t), \mathbf{z}) - \mathcal{A}^{(k)}[f](\mathbf{z})] (f(\mathbf{r}, \mathbf{z}) - \mathcal{A}^{(k)}[f](\mathbf{z}))^2 p_k(\mathbf{r}, \mathbf{z}) d\mathbf{r} dt.$$

Moreover, as  $k$  goes to infinity,  $\text{Var}[\xi_k[f](\mathbf{z})] = \text{Var}[\xi[f](\mathbf{z})] + O(1/k)$  and  $\tau_k[f](\mathbf{z}) = \tau[f](\mathbf{z}) + O(1/\sqrt{k})$ , where  $\xi[f]$  and  $\tau[f]$  are defined by replacing  $\mathcal{A}^{(k)}[f]$  by its limiting functional

$$\mathcal{A}[f](\mathbf{z}) = Z^{-1} e^{\beta U(\mathbf{z})} \int_{\mathbb{R}^{3N}} f(\mathbf{r}, \mathbf{z}) e^{-\beta V(\mathbf{r})} \prod_{j=1}^N \delta(z_j - x_j(\mathbf{r})) d\mathbf{r}.$$

Now we are ready to give upper bounds for the errors of estimators of  $\nabla U(\mathbf{z})$ ,  $M(\mathbf{z})$ ,  $\nabla M(\mathbf{z})$  and  $\nabla^2 U(\mathbf{z})$  by applying Lemma 1.1 and 1.2 respectively.

### A.1 ERROR OF $M(\mathbf{z})$

Define  $f_{ij}(\mathbf{r}) = \sum_k \frac{\partial x_i(\mathbf{r}(\alpha))}{\partial r_k} \frac{\partial x_j(\mathbf{r}(\alpha))}{\partial r_k}$ , and  $\mathbf{1}(\mathbf{r}) = 1$ . Then  $M_{ij}(\mathbf{z})$  can be written as

$$\begin{aligned} M_{ij}(\mathbf{z}) &= Z^{-1} e^{\beta U(\mathbf{z})} \int_{\mathbb{R}^{3D}} \sum_k \frac{\partial x_i(\mathbf{r}(\alpha))}{\partial r_k} \frac{\partial x_j(\mathbf{r}(\alpha))}{\partial r_k} e^{-\beta V(\mathbf{r})} \prod_{i=1}^N (z_i - x_i(\mathbf{r})) d\mathbf{r} \\ &= \frac{\int_{\mathbb{R}^{3D}} f_{ij}(\mathbf{r}) e^{-\beta V(\mathbf{r})} \prod_{i=1}^N (z_i - x_i(\mathbf{r})) d\mathbf{r}}{\int_{\mathbb{R}^{3D}} e^{-\beta V(\mathbf{r})} \prod_{i=1}^N (z_i - x_i(\mathbf{r})) d\mathbf{r}} = \frac{\mathcal{I}[f_{ij}](\mathbf{z})}{\mathcal{I}[\mathbf{1}](\mathbf{z})}. \end{aligned}$$

Therefore, the finite- $k$  error  $|M_{ij}(\mathbf{z}) - M_{ij}^{(k)}(\mathbf{z})|$  is bounded by

$$\begin{aligned} |M_{ij}(\mathbf{z}) - M_{ij}^{(k)}(\mathbf{z})| &= \left| \frac{\mathcal{I}[f_{ij}](\mathbf{z})}{\mathcal{I}[\mathbf{1}](\mathbf{z})} - \frac{\mathcal{I}^{(k)}[f_{ij}](\mathbf{z})}{\mathcal{I}^{(k)}[\mathbf{1}](\mathbf{z})} \right| \\ &\leq \frac{1}{2\beta k} \frac{\mathcal{I}[f_{ij}](\mathbf{z}) \text{Tr}[\nabla^2 \mathcal{I}[\mathbf{1}](\mathbf{z})] + \text{Tr}[\nabla^2 \mathcal{I}[f_{ij}](\mathbf{z})] \mathcal{I}[\mathbf{1}](\mathbf{z})}{(\mathcal{I}[\mathbf{1}](\mathbf{z}))^2} + O\left(\frac{1}{k^2}\right). \end{aligned}$$

The finite- $T$  error is bounded by

$$\begin{aligned} |M_{ij}^{(T,k)}(\mathbf{z}) - M_{ij}^{(k)}(\mathbf{z})| &= \left| \frac{1}{T} \int_0^T f_{ij}(\mathbf{z}) dt - \int_{\mathbb{R}^{3D}} f_{ij}(\mathbf{z}) p_k(\mathbf{r}, \mathbf{z}) d\mathbf{r} \right| \\ &= |\mathcal{A}^{(T,k)}[f_{ij}](\mathbf{z}) - \mathcal{A}_k[f_{ij}](\mathbf{z})| \rightarrow \sqrt{\frac{\tau[f_{ij}](\mathbf{z})}{T}} \xi_k[f_{ij}](\mathbf{z}). \end{aligned}$$

### A.2 ERROR OF $\nabla U(\mathbf{z})$

$\nabla_i U(\mathbf{z})$  can be written as

$$\begin{aligned} \nabla_i U(\mathbf{z}) &= -\beta^{-1} \nabla_i \ln \left( Z^{-1} \int_{\mathbb{R}^{3D}} \exp(-\beta V(\mathbf{r})) \prod_{j=1}^N \delta(x_j(\mathbf{r}) - z_j) d\mathbf{r} \right) \\ &= -\beta^{-1} \nabla_i \ln \mathcal{I}[\mathbf{1}](\mathbf{z}) = -\beta^{-1} \frac{\nabla_i \mathcal{I}[\mathbf{1}](\mathbf{z})}{\mathcal{I}[\mathbf{1}](\mathbf{z})}. \end{aligned}$$

The finite- $k$  error is bounded by

$$\begin{aligned} |\nabla_i U(\mathbf{z}) - \nabla_i U^{(k)}(\mathbf{z})| &= \beta^{-1} \left| \frac{\nabla_i \mathcal{I}[\mathbf{1}](\mathbf{z})}{\mathcal{I}[\mathbf{1}](\mathbf{z})} - \frac{\nabla_i \mathcal{I}^{(k)}[\mathbf{1}](\mathbf{z})}{\mathcal{I}^{(k)}[\mathbf{1}](\mathbf{z})} \right| \\ &\leq \frac{1}{2\beta^2 k} \frac{|\nabla_i \mathcal{I}[\mathbf{1}](\mathbf{z})| \text{Tr}[\nabla^2 \mathcal{I}[\mathbf{1}](\mathbf{z})] + |\nabla_i \text{Tr}[\nabla^2 \mathcal{I}[\mathbf{1}](\mathbf{z})]| \mathcal{I}[\mathbf{1}](\mathbf{z})}{(\mathcal{I}[\mathbf{1}](\mathbf{z}))^2} + O\left(\frac{1}{k^2}\right). \end{aligned}$$

The finite- $T$  error is bounded by

$$\begin{aligned} |\nabla_i U^{(T,k)}(\mathbf{z}) - \nabla_i U^{(k)}(\mathbf{z})| &= \left| \frac{k}{T} \int_0^T (z_i - x_i(\mathbf{r}(t))) dt - \int_{\mathbb{R}^{3D}} k(z_i - x_i(\mathbf{r})) p_k(\mathbf{r}, \mathbf{z}) d\mathbf{r} \right| \\ &= k |\mathcal{A}^{(T,k)}[z_i - x_i(\mathbf{r})](\mathbf{z}) - \mathcal{A}_k[z_i - x_i(\mathbf{r})](\mathbf{z})| \rightarrow k \sqrt{\frac{\tau[z_i - x_i(\mathbf{r})](\mathbf{z})}{T}} \xi_k[z_i - x_i(\mathbf{r})](\mathbf{z}). \end{aligned}$$

### A.3 ERROR OF $\nabla M(\mathbf{z})$

$\nabla_l M_{ij}(\mathbf{z})$  can be written as

$$\nabla_l M_{ij}(\mathbf{z}) = \nabla_l \left( \frac{\mathcal{I}[f_{ij}](\mathbf{z})}{\mathcal{I}[\mathbf{1}](\mathbf{z})} \right) = \frac{\nabla_l \mathcal{I}[f_{ij}](\mathbf{z}) \mathcal{I}[\mathbf{1}](\mathbf{z}) - \mathcal{I}[f_{ij}](\mathbf{z}) \nabla_l \mathcal{I}[\mathbf{1}](\mathbf{z})}{(\mathcal{I}[\mathbf{1}](\mathbf{z}))^2}.$$

Therefore, the finite- $k$  error is bounded by

$$\begin{aligned}
& |\nabla_l M_{ij}(\mathbf{z}) - \nabla_l M_{ij}^{(k)}(\mathbf{z})| \\
&= \left| \frac{\nabla_l \mathcal{I}[f_{ij}](\mathbf{z}) \mathcal{I}[\mathbf{1}](\mathbf{z}) - \mathcal{I}[f_{ij}](\mathbf{z}) \nabla_l \mathcal{I}[\mathbf{1}](\mathbf{z})}{(\mathcal{I}[\mathbf{1}](\mathbf{z}))^2} - \frac{\nabla_l \mathcal{I}^{(k)}[f_{ij}](\mathbf{z}) \mathcal{I}^{(k)}[\mathbf{1}](\mathbf{z}) - \mathcal{I}^{(k)}[f_{ij}](\mathbf{z}) \nabla_l \mathcal{I}^{(k)}[\mathbf{1}](\mathbf{z})}{(\mathcal{I}^{(k)}[\mathbf{1}](\mathbf{z}))^2} \right| \\
&\leq \left| \frac{\nabla_l \mathcal{I}[f_{ij}](\mathbf{z})}{\mathcal{I}[\mathbf{1}](\mathbf{z})} - \frac{\nabla_l \mathcal{I}^{(k)}[f_{ij}](\mathbf{z})}{\mathcal{I}^{(k)}[\mathbf{1}](\mathbf{z})} \right| + \left| \frac{\mathcal{I}[f_{ij}](\mathbf{z}) \nabla_l \mathcal{I}[\mathbf{1}](\mathbf{z})}{(\mathcal{I}[\mathbf{1}](\mathbf{z}))^2} - \frac{\mathcal{I}^{(k)}[f_{ij}](\mathbf{z}) \nabla_l \mathcal{I}^{(k)}[\mathbf{1}](\mathbf{z})}{(\mathcal{I}^{(k)}[\mathbf{1}](\mathbf{z}))^2} \right| \\
&\leq \frac{1}{2\beta k} \left( \frac{|\nabla_l \mathcal{I}[f_{ij}](\mathbf{z})| \text{Tr}[\nabla^2 \mathcal{I}[\mathbf{1}](\mathbf{z})] + |\nabla_l \text{Tr}[\nabla^2 \mathcal{I}[f_{ij}](\mathbf{z})]| \mathcal{I}[\mathbf{1}](\mathbf{z})}{(\mathcal{I}[\mathbf{1}](\mathbf{z}))^2} \right. \\
&\quad \left. + \frac{\mathcal{I}[f_{ij}](\mathbf{z}) |\nabla_l \text{Tr}[\nabla^2 \mathcal{I}[\mathbf{1}](\mathbf{z})]| + \text{Tr}[\nabla^2 \mathcal{I}[f_{ij}](\mathbf{z})] |\nabla_l \mathcal{I}[\mathbf{1}](\mathbf{z})|}{(\mathcal{I}[\mathbf{1}](\mathbf{z}))^2} + \frac{\mathcal{I}[f_{ij}](\mathbf{z}) |\nabla_l \mathcal{I}[\mathbf{1}](\mathbf{z})| \text{Tr}[\nabla^2 \mathcal{I}[\mathbf{1}](\mathbf{z})]}{(\mathcal{I}[\mathbf{1}](\mathbf{z}))^3} \right) + O\left(\frac{1}{k^2}\right).
\end{aligned}$$

The finite- $T$  error is bounded by

$$\begin{aligned}
& |\nabla_l M_{ij}^{(T,k)}(\mathbf{z}) - \nabla_l M_{ij}^{(k)}(\mathbf{z})| \leq |\mathcal{A}^{(T,k)}\left[\frac{\partial f_{ij}(\mathbf{z})}{z_l}\right](\mathbf{z}) - \mathcal{A}^{(k)}\left[\frac{\partial f_{ij}(\mathbf{z})}{z_l}\right](\mathbf{z})| \\
&\quad + \beta k |\mathcal{A}^{(T,k)}[f_{ij}(\mathbf{z})(z_l - x_l(\mathbf{r}))](\mathbf{z}) - \mathcal{A}^{(k)}[f_{ij}(\mathbf{z})(z_l - x_l(\mathbf{r}))](\mathbf{z})| \\
&\quad + \beta k |\mathcal{A}^{(T,k)}[f_{ij}(\mathbf{z})](\mathbf{z}) \mathcal{A}^{(T,k)}[(z_l - x_l(\mathbf{r}))](\mathbf{z}) - \mathcal{A}^{(k)}[f_{ij}(\mathbf{z})](\mathbf{z}) \mathcal{A}^{(k)}[(z_l - x_l(\mathbf{r}))](\mathbf{z})| \\
&\rightarrow \sqrt{\frac{\tau\left[\frac{\partial f_{ij}(\mathbf{z})}{z_l}\right](\mathbf{z})}{T}} \xi\left[\frac{\partial f_{ij}(\mathbf{z})}{z_l}\right](\mathbf{z}) + \beta k \sqrt{\frac{\tau[f_{ij}(\mathbf{z})(z_l - x_l(\mathbf{r}))](\mathbf{z})}{T}} \xi[f_{ij}(\mathbf{z})(z_l - x_l(\mathbf{r}))](\mathbf{z}) \\
&\quad + \beta k \sqrt{\frac{\tau[f_{ij}(\mathbf{z})](\mathbf{z})}{T}} \mathcal{A}^{(k)}[(z_l - x_l(\mathbf{r}))](\mathbf{z}) \xi[f_{ij}(\mathbf{z})](\mathbf{z}) \\
&\quad + \beta k \sqrt{\frac{\tau[(z_l - x_l(\mathbf{r}))](\mathbf{z})}{T}} \mathcal{A}^{(k)}[f_{ij}(\mathbf{z})](\mathbf{z}) \xi[(z_l - x_l(\mathbf{r}))](\mathbf{z}) + O\left(\frac{1}{T}\right).
\end{aligned}$$

#### A.4 ERROR OF $\nabla^2 U(\mathbf{z})$

$\nabla_{ij}^2 U(\mathbf{z})$  can be written as

$$\nabla_{ij}^2 U(\mathbf{z}) = \nabla_j \left( -\beta^{-1} \frac{\nabla_i \mathcal{I}[\mathbf{1}](\mathbf{z})}{\mathcal{I}[\mathbf{1}](\mathbf{z})} \right) = -\beta^{-1} \frac{\nabla_{ij}^2 \mathcal{I}[\mathbf{1}](\mathbf{z}) \mathcal{I}[\mathbf{1}](\mathbf{z}) - \nabla_i \mathcal{I}[\mathbf{1}](\mathbf{z}) \nabla_j \mathcal{I}[\mathbf{1}](\mathbf{z})}{(\mathcal{I}[\mathbf{1}](\mathbf{z}))^2}.$$

Therefore, the finite- $k$  error is bounded by

$$\begin{aligned}
& |\nabla_{ij}^2 U(\mathbf{z}) - \nabla_{ij}^2 U^{(k)}(\mathbf{z})| \\
&= \beta^{-1} \left| \frac{\nabla_{ij}^2 \mathcal{I}[\mathbf{1}](\mathbf{z}) \mathcal{I}[\mathbf{1}](\mathbf{z}) - \nabla_i \mathcal{I}[\mathbf{1}](\mathbf{z}) \nabla_j \mathcal{I}[\mathbf{1}](\mathbf{z})}{(\mathcal{I}[\mathbf{1}](\mathbf{z}))^2} - \frac{\nabla_{ij}^2 \mathcal{I}^{(k)}[\mathbf{1}](\mathbf{z}) \mathcal{I}^{(k)}[\mathbf{1}](\mathbf{z}) - \nabla_i \mathcal{I}^{(k)}[\mathbf{1}](\mathbf{z}) \nabla_j \mathcal{I}^{(k)}[\mathbf{1}](\mathbf{z})}{(\mathcal{I}^{(k)}[\mathbf{1}](\mathbf{z}))^2} \right| \\
&\leq \beta^{-1} \left( \left| \frac{\nabla_{ij}^2 \mathcal{I}[\mathbf{1}](\mathbf{z})}{\mathcal{I}[\mathbf{1}](\mathbf{z})} - \frac{\nabla_{ij}^2 \mathcal{I}^{(k)}[\mathbf{1}](\mathbf{z})}{\mathcal{I}^{(k)}[\mathbf{1}](\mathbf{z})} \right| + \left| \frac{\nabla_i \mathcal{I}[\mathbf{1}](\mathbf{z}) \nabla_j \mathcal{I}[\mathbf{1}](\mathbf{z})}{(\mathcal{I}[\mathbf{1}](\mathbf{z}))^2} - \frac{\nabla_i \mathcal{I}^{(k)}[\mathbf{1}](\mathbf{z}) \nabla_j \mathcal{I}^{(k)}[\mathbf{1}](\mathbf{z})}{(\mathcal{I}^{(k)}[\mathbf{1}](\mathbf{z}))^2} \right| \right) \\
&\leq \frac{1}{2\beta^2 k} \left( \frac{|\nabla_{ij}^2 \mathcal{I}[\mathbf{1}](\mathbf{z})| \text{Tr}[\nabla^2 \mathcal{I}[\mathbf{1}](\mathbf{z})] + |\nabla_{ij}^2 \text{Tr}[\nabla^2 \mathcal{I}[\mathbf{1}](\mathbf{z})]| \mathcal{I}[\mathbf{1}](\mathbf{z})}{(\mathcal{I}[\mathbf{1}](\mathbf{z}))^2} \right. \\
&\quad \left. + \frac{|\nabla_i \mathcal{I}[\mathbf{1}](\mathbf{z}) \nabla_j \text{Tr}[\nabla^2 \mathcal{I}[\mathbf{1}](\mathbf{z})]| + |\nabla_i \text{Tr}[\nabla^2 \mathcal{I}[\mathbf{1}](\mathbf{z})] \nabla_j \mathcal{I}[\mathbf{1}](\mathbf{z})|}{(\mathcal{I}[\mathbf{1}](\mathbf{z}))^2} + \frac{|\nabla_i \mathcal{I}[\mathbf{1}](\mathbf{z}) \nabla_j \mathcal{I}[\mathbf{1}](\mathbf{z})| \text{Tr}[\nabla^2 \mathcal{I}[\mathbf{1}](\mathbf{z})]}{(\mathcal{I}[\mathbf{1}](\mathbf{z}))^3} \right) + O\left(\frac{1}{k^2}\right).
\end{aligned}$$

The finite- $T$  error is bounded by

$$\begin{aligned}
& |\nabla_{ij}^2 U^{(T,k)}(\mathbf{z}) - \nabla_{ij}^2 U^{(k)}(\mathbf{z})| \leq k |\mathcal{A}^{(T,k)}[\frac{\partial(z_j - x_j(\mathbf{r}))}{z_i}](\mathbf{z}) - \mathcal{A}^{(k)}[\frac{\partial(z_j - x_j(\mathbf{r}))}{z_i}](\mathbf{z})| \\
& + \beta k^2 |\mathcal{A}^{(T,k)}[(z_j - x_j(\mathbf{r}))(z_i - x_i(\mathbf{r}))](\mathbf{z}) - \mathcal{A}^{(k)}[(z_j - x_j(\mathbf{r}))(z_i - x_i(\mathbf{r}))](\mathbf{z})| \\
& + \beta k^2 |\mathcal{A}^{(T,k)}[(z_j - x_j(\mathbf{r}))](\mathbf{z}) \mathcal{A}^{(T,k)}[(z_i - x_i(\mathbf{r}))](\mathbf{z}) - \mathcal{A}^{(k)}[(z_j - x_j(\mathbf{r}))](\mathbf{z}) \mathcal{A}^{(k)}[(z_i - x_i(\mathbf{r}))](\mathbf{z})| \\
\rightarrow & k \sqrt{\frac{\tau[\frac{\partial(z_j - x_j(\mathbf{r}))}{z_i}](\mathbf{z})}{T}} \xi[\frac{\partial(z_j - x_j(\mathbf{r}))}{z_i}](\mathbf{z}) + \beta k^2 \sqrt{\frac{\tau[(z_j - x_j(\mathbf{r}))(z_i - x_i(\mathbf{r}))](\mathbf{z})}{T}} \xi[(z_j - x_j(\mathbf{r}))(z_i - x_i(\mathbf{r}))](\mathbf{z}) \\
& + \beta k^2 \sqrt{\frac{\tau[(z_i - x_i(\mathbf{r}))](\mathbf{z})}{T}} \mathcal{A}^{(k)}[(z_j - x_j(\mathbf{r}))](\mathbf{z}) \xi[(z_i - x_i(\mathbf{r}))](\mathbf{z}) \\
& + \beta k^2 \sqrt{\frac{\tau[(z_j - x_j(\mathbf{r}))](\mathbf{z})}{T}} \mathcal{A}^{(k)}[(z_i - x_i(\mathbf{r}))](\mathbf{z}) \xi[(z_j - x_j(\mathbf{r}))](\mathbf{z}) + O(\frac{1}{T}).
\end{aligned}$$

## B CONVERGENCE RATE OF HESSIAN-VECTOR PRODUCT ESTIMATOR

Here we discuss the convergence rate of using Hessian vector product estimator

$$\frac{\nabla U(\mathbf{z} + \delta v) - \nabla U(\mathbf{z} - \delta v)}{2\delta},$$

compared to the direct estimator  $\nabla^2 U v$ . Here  $v = \frac{M^T M \nabla U}{\|M \nabla U\|}$ . By Theorem 4.1, we know that

- For any  $\mathbf{z}$ , the error of estimating  $\nabla U$  is bounded by  $|\nabla_i U(\mathbf{z}) - \nabla_i U^{(T,k)}(\mathbf{z})| \leq O(\frac{1}{k} + \frac{k}{\sqrt{T}})$ ,
- For any  $\mathbf{z}$ , the error of estimating  $v = \frac{M^T M \nabla U}{\|M \nabla U\|}$  is bounded by  $|v_i(\mathbf{z}) - v_i^{(T,k)}(\mathbf{z})| \leq O(\frac{1}{k} + \frac{k}{\sqrt{T}})$ ,
- For any  $\mathbf{z}$ , the error of estimating  $\nabla^2 U$  is bounded by  $|\nabla_{ij}^2 U(\mathbf{z}) - \nabla_{ij}^2 U^{(T,k)}(\mathbf{z})| \leq O(\frac{1}{k} + \frac{k^2}{\sqrt{T}})$ .

First we consider the error of directly estimating  $\nabla^2 U v$ .

$$\begin{aligned}
& |(\nabla^2 U v)_i - (\nabla^2 U^{(T,k)} v^{(T,k)})_i| = |\sum_j \nabla_{ij}^2 U(\mathbf{z}) v_j(\mathbf{z}) - \nabla_{ij}^2 U^{(T,k)}(\mathbf{z}) v_j^{(T,k)}(\mathbf{z})| \\
& \leq \sum_j |\nabla_{ij}^2 U(\mathbf{z}) v_j(\mathbf{z}) - \nabla_{ij}^2 U^{(T,k)}(\mathbf{z}) v_j^{(T,k)}(\mathbf{z})| \\
& \leq \sum_j (|\nabla_{ij}^2 U(\mathbf{z}) - \nabla_{ij}^2 U^{(T,k)}(\mathbf{z})| v_j(\mathbf{z}) + |v_j(\mathbf{z}) - v_j^{(T,k)}(\mathbf{z})| \nabla_{ij}^2 U(\mathbf{z}) + |\nabla_{ij}^2 U(\mathbf{z}) - \nabla_{ij}^2 U^{(T,k)}(\mathbf{z})| |v_j(\mathbf{z}) - v_j^{(T,k)}(\mathbf{z})|) \\
& \leq O(\frac{1}{k} + \frac{k^2}{\sqrt{T}}).
\end{aligned}$$

So the convergence rate of the error is  $O(\frac{1}{k} + \frac{k^2}{\sqrt{T}})$ , due to the contribution of  $|\nabla_{ij}^2 U(\mathbf{z}) - \nabla_{ij}^2 U^{(T,k)}(\mathbf{z})|$ .

Now let's consider the Hessian-vector product estimator. The error can be decomposed into three terms as follows

$$\begin{aligned}
& \left| \frac{\nabla_i U^{(T,k)}(\mathbf{z} + \delta v^{(T,k)}) - \nabla_i U^{(T,k)}(\mathbf{z} - \delta v^{(T,k)})}{2\delta} - (\nabla^2 U v)_i \right| \\
& \leq \left| \frac{\nabla_i U^{(T,k)}(\mathbf{z} + \delta v^{(T,k)}) - \nabla_i U^{(T,k)}(\mathbf{z} - \delta v^{(T,k)})}{2\delta} - \frac{\nabla_i U(\mathbf{z} + \delta v^{(T,k)}) - \nabla_i U(\mathbf{z} - \delta v^{(T,k)})}{2\delta} \right| \\
& + \left| \frac{\nabla_i U(\mathbf{z} + \delta v^{(T,k)}) - \nabla_i U(\mathbf{z} - \delta v^{(T,k)})}{2\delta} - (\nabla^2 U v^{(T,k)})_i \right| \\
& + |(\nabla^2 U v^{(T,k)})_i - (\nabla^2 U v)_i|.
\end{aligned}$$

The first term comes from the error of estimating  $\nabla U$ , which can be upper bounded by

$$\begin{aligned} & \left| \frac{\nabla_i U^{(T,k)}(\mathbf{z} + \delta v^{(T,k)}) - \nabla_i U^{(T,k)}(\mathbf{z} - \delta v^{(T,k)})}{2\delta} - \frac{\nabla_i U(\mathbf{z} + \delta v^{(T,k)}) - \nabla_i U(\mathbf{z} - \delta v^{(T,k)})}{2\delta} \right| \\ & \leq \frac{1}{2\delta} \left( |\nabla_i U^{(T,k)}(\mathbf{z} + \delta v^{(T,k)}) - \nabla_i U(\mathbf{z} + \delta v^{(T,k)})| + |\nabla_i U^{(T,k)}(\mathbf{z} - \delta v^{(T,k)}) - \nabla_i U(\mathbf{z} - \delta v^{(T,k)})| \right) \\ & \leq O\left(\frac{1}{\delta} \left(\frac{1}{k} + \frac{k}{\sqrt{T}}\right)\right). \end{aligned}$$

The second term comes from finite difference estimate of  $\nabla^2 U$ . Using Taylor expansion,

$$\begin{aligned} & \nabla_i U(\mathbf{z} + \delta v^{(T,k)}) - \nabla_i U(\mathbf{z} - \delta v^{(T,k)}) \\ & = \left( U_i(\mathbf{z}) + \delta v^{(T,k)} \nabla \nabla_i U(\mathbf{z}) + \frac{\delta^2}{2} (v^{(T,k)})^T \nabla^2 \nabla_i U(\mathbf{z}) v^{(T,k)} \right) \\ & - \left( U_i(\mathbf{z}) - \delta v^{(T,k)} \nabla \nabla_i U(\mathbf{z}) + \frac{\delta^2}{2} (v^{(T,k)})^T \nabla^2 \nabla_i U(\mathbf{z}) v^{(T,k)} \right) + O(\delta^3) \\ & = 2\delta (\nabla^2 U v^{(T,k)})_i + O(\delta^3). \end{aligned}$$

Therefore, the error is bounded by

$$\left| \frac{\nabla_i U(\mathbf{z} + \delta v^{(T,k)}) - \nabla_i U(\mathbf{z} - \delta v^{(T,k)})}{2\delta} - (\nabla^2 U v^{(T,k)})_i \right| = O(\delta^2).$$

The third term comes from the error of estimating  $v$ , which can be upper bounded by

$$|(\nabla^2 U v^{(T,k)})_i - (\nabla^2 U v)_i| \leq \sum_j \nabla_{ij}^2 U(\mathbf{z}) |v_j(\mathbf{z}) - v_j^{(T,k)}(\mathbf{z})| \leq O\left(\frac{1}{k} + \frac{k}{\sqrt{T}}\right).$$

The combined convergence rate of the total estimation error is bounded by

$$\begin{aligned} & \left| \frac{\nabla_i U^{(T,k)}(\mathbf{z} + \delta v^{(T,k)}) - \nabla_i U^{(T,k)}(\mathbf{z} - \delta v^{(T,k)})}{2\delta} - (\nabla^2 U v)_i \right| \\ & \leq O\left(\frac{1}{\delta} \left(\frac{1}{k} + \frac{k}{\sqrt{T}}\right)\right) + O(\delta^2) + O\left(\frac{1}{k} + \frac{k}{\sqrt{T}}\right). \end{aligned}$$

The upper bound contains two terms of  $\delta$  which are  $O(\frac{1}{\delta}(\frac{1}{k} + \frac{k}{\sqrt{T}}))$  and  $O(\delta^2)$ . The optimal  $\delta$  is  $O((\frac{1}{k} + \frac{k}{\sqrt{T}})^{1/3})$  which makes the rate of the error be  $O((\frac{1}{k} + \frac{k}{\sqrt{T}})^{2/3})$ . The third term is always not the leading term.

*Remark:* The benefit of Hessian-vector product estimator depends on how fast  $T$  grows as  $k$  grows. Let  $\alpha = \lim_{k \rightarrow \infty} \frac{\log T}{\log k}$ .

- If  $\alpha \leq 2$ , neither direct estimator nor Hessian-vector product estimator converges.
- If  $2 < \alpha \leq 4$ , direct estimator does not converge, but Hessian-vector product estimator converges at a rate of  $O(k^{-(\alpha-2)/3})$ .
- If  $4 < \alpha \leq 6$ , both estimators converge. The direct estimator converges at a rate of  $O(k^{-(\alpha-4)/2})$  and the Hessian-vector product estimator converges at a rate of  $O(k^{-2/3})$ . If  $\alpha \leq 16/3$ , the Hessian-vector product estimator converges faster and if  $\alpha > 16/3$ , the direct estimator converges faster.
- If  $\alpha > 6$ , both estimators converge. The direct estimator converges at a rate of  $O(k^{-1})$  and the Hessian-vector product estimator converges at a rate of  $O(k^{-2/3})$ . The direct estimator converges faster.

The relation between the convergence rate and  $\alpha$  are shown in Figure 1.

## C MÜLLER POTENTIAL PARAMETERS

This section provides the detailed parameters in Eq.(21).

$$\begin{aligned} A & = (-200, -100, -170, 15), \quad a = (-1, -1, -6.5, 0.7), \\ b & = (0, 0, 11, 0.6), \quad c = (-10, -10, -6.5, 0.7), \\ x^0 & = (1, 0, -0.5, -1), \quad y^0 = (0, 0.5, 1.5, 1). \end{aligned}$$

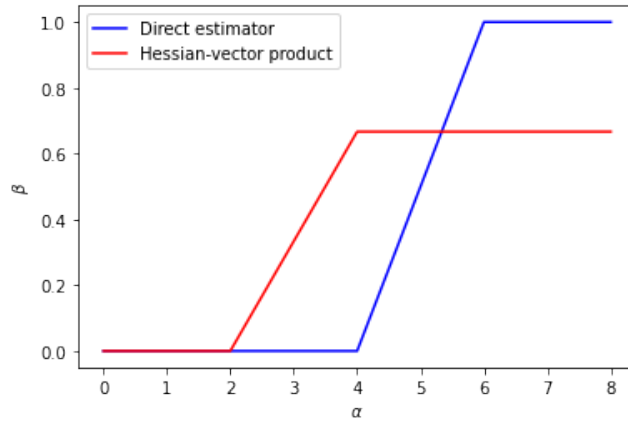

Figure 1: Relation between the convergence rate  $\beta = -\lim_{k \rightarrow \infty} \frac{\log |\nabla^2 U^{(T,k)} v^{(T,k)} - \nabla^2 U v|}{\log k}$  and the rate  $\alpha = \lim_{k \rightarrow \infty} \frac{\log T}{\log k}$ .
